# Supplementary material
Source: bioRxiv or medRxiv preprint supplement (https://medrxiv.org/highwire/filestream/97041/field_highwire_adjunct_files/6/2020.09.11.20187369-7.pdf)
Supplement: Supplementary file [file 2020.09.11.20187369-7.pdf]

**Supplementary Table 2. Cell-type proportions per sample in scRNAseq (related to Figure 2)**

| Sample       | Patient | Max Disease Pseudotime         | Pseudo time | Total cell n | CD4+ Tcells | CD8+ Tcells | Monocytes |
|--------------|---------|--------------------------------|-------------|--------------|-------------|-------------|-----------|
| 008_TA       | 008     | Incremental                    | 3           | 9776         | 1848        | 121         | 6414      |
| 009_TA       | 009     | Moderate or early convalescent | 4           | 13349        | 3095        | 1765        | 4853      |
| 009_TB       | 009     | Recovery/pre-discharge         | 6           | 12389        | 4472        | 2456        | 1906      |
| 010_TC       | 010     | Late convalescent              | 5           | 13942        | 5495        | 2959        | 1123      |
| 011_TA       | 011     | Recovery/pre-discharge         | 6           | 9656         | 2053        | 733         | 5514      |
| 011_TB       | 011     | Recovery/pre-discharge         | 6           | 12710        | 1239        | 914         | 8664      |
| 012_TA       | 012     | Critical                       | 2           | 10662        | 4407        | 1355        | 1740      |
| 012_TB       | 012     | Complicated                    | 3           | 13511        | 3123        | 3304        | 2927      |
| 012_TC       | 012     | Late convalescent              | 5           | 1579         | 519         | 230         | 103       |
| 012_TE       | 012     | Late convalescent              | 5           | 14471        | 5712        | 1936        | 1048      |
| 014_TA       | 014     | Moderate or early convalescent | 4           | 11051        | 1684        | 1397        | 983       |
| 001_TA       | 001     | Moderate or early convalescent | 4           | 4334         | 1212        | 613         | 1218      |
| 001_TA2      | 001     | Moderate or early convalescent | 4           | 11658        | 1950        | 1757        | 2978      |
| 001_TB       | 001     | Late convalescent              | 5           | 9637         | 1468        | 1578        | 4737      |
| 001_TC       | 001     | Recovery/pre-discharge         | 6           | 8056         | 1989        | 1381        | 2743      |
| 002_TA       | 002     | Incremental                    | 1           | 8516         | 1510        | 1295        | 2874      |
| 002_TA2      | 002     | Critical                       | 2           | 11027        | 1222        | 787         | 6232      |
| H002_control | H002    | Healthy                        | 0           | 3293         | 2050        | 234         | 9         |
| 004_TA       | 004     | Incremental                    | 1           | 2520         | 1082        | 391         | 400       |
| 004_TA2      | 004     | Complicated                    | 3           | 6185         | 1651        | 481         | 1685      |
| 004_TB       | 004     | Late convalescent              | 5           | 9534         | 1640        | 654         | 3897      |
| H004_control | H004    | Healthy                        | 0           | 7869         | 3267        | 367         | 16        |
| 005_TA       | 005     | Incremental                    | 1           | 18783        | 4880        | 1596        | 7214      |
| 005_TA2      | 005     | Complicated                    | 3           | 14643        | 3622        | 987         | 6813      |
| 005_TB       | 005     | Recovery/pre-discharge         | 6           | 21263        | 7411        | 2085        | 5157      |
| 006_TA       | 006     | Late convalescent              | 5           | 18279        | 2731        | 926         | 12074     |
| 006_TA2      | 006     | Late convalescent              | 5           | 13727        | 1953        | 561         | 9580      |
| 006_TB       | 006     | Recovery/pre-discharge         | 6           | 14234        | 3218        | 1428        | 7213      |
| 006_rec      | 006     | Long term follow-up            | 7           | 8954         | 2184        | 854         | 4940      |
| H006_control | H006    | Healthy                        | 0           | 11351        | 3265        | 2196        | 54        |
| 007_rec      | 007     | Long term follow-up            | 7           | 9353         | 3368        | 1676        | 2810      |
| H012_control | H012    | Healthy                        | 0           | 10511        | 4516        | 632         | 3108      |
| H013_control | H013    | Healthy                        | 0           | 12107        | 3935        | 4446        | 624       |

Continued:

| Sample       | NK cells | Granulocytes | B cells | ProLymph | MK   | PB   | Erythroid | DC  | Precursors |
|--------------|----------|--------------|---------|----------|------|------|-----------|-----|------------|
| 008_TA       | 114      | 333          | 171     | 294      | 179  | 255  | 3         | 24  | 20         |
| 009_TA       | 1325     | 332          | 614     | 239      | 460  | 249  | 351       | 11  | 55         |
| 009_TB       | 1906     | 698          | 607     | 125      | 118  | 50   | 1         | 30  | 20         |
| 010_TC       | 1053     | 940          | 347     | 952      | 131  | 858  | 1         | 51  | 32         |
| 011_TA       | 637      | 213          | 383     | 12       | 64   | 19   | 1         | 2   | 25         |
| 011_TB       | 1126     | 185          | 380     | 23       | 65   | 80   | 0         | 2   | 32         |
| 012_TA       | 643      | 341          | 503     | 1222     | 37   | 234  | 141       | 16  | 23         |
| 012_TB       | 753      | 1878         | 318     | 985      | 94   | 91   | 7         | 13  | 18         |
| 012_TC       | 98       | 65           | 24      | 54       | 2    | 46   | 435       | 2   | 1          |
| 012_TE       | 854      | 741          | 201     | 133      | 14   | 67   | 3725      | 35  | 5          |
| 014_TA       | 2844     | 1420         | 380     | 221      | 302  | 1677 | 46        | 39  | 58         |
| 001_TA       | 316      | 439          | 151     | 81       | 208  | 73   | 1         | 13  | 9          |
| 001_TA2      | 1010     | 539          | 310     | 1938     | 545  | 581  | 0         | 28  | 22         |
| 001_TB       | 711      | 189          | 213     | 193      | 206  | 298  | 0         | 24  | 20         |
| 001_TC       | 800      | 666          | 171     | 66       | 137  | 50   | 0         | 39  | 14         |
| 002_TA       | 1059     | 157          | 168     | 754      | 305  | 332  | 2         | 35  | 25         |
| 002_TA2      | 743      | 75           | 292     | 180      | 1243 | 215  | 4         | 16  | 18         |
| H002_control | 312      | 413          | 255     | 2        | 6    | 2    | 0         | 5   | 5          |
| 004_TA       | 145      | 309          | 77      | 31       | 14   | 62   | 0         | 3   | 6          |
| 004_TA2      | 225      | 1100         | 199     | 136      | 445  | 219  | 0         | 20  | 24         |
| 004_TB       | 399      | 1630         | 222     | 223      | 256  | 500  | 6         | 34  | 73         |
| H004_control | 1921     | 1733         | 484     | 46       | 19   | 6    | 0         | 7   | 3          |
| 005_TA       | 2058     | 657          | 1186    | 315      | 549  | 268  | 0         | 43  | 17         |
| 005_TA2      | 1154     | 291          | 1050    | 191      | 198  | 263  | 0         | 42  | 32         |
| 005_TB       | 2744     | 1121         | 1783    | 354      | 278  | 193  | 0         | 93  | 44         |
| 006_TA       | 760      | 183          | 205     | 386      | 600  | 228  | 0         | 106 | 80         |
| 006_TA2      | 305      | 128          | 266     | 284      | 435  | 121  | 0         | 45  | 49         |
| 006_TB       | 454      | 476          | 372     | 572      | 218  | 113  | 4         | 92  | 75         |
| 006_rec      | 238      | 179          | 278     | 30       | 138  | 12   | 36        | 50  | 15         |
| H006_control | 2215     | 2632         | 839     | 49       | 27   | 25   | 0         | 44  | 5          |
| 007_rec      | 665      | 152          | 380     | 36       | 68   | 31   | 1         | 150 | 16         |
| H012_control | 933      | 192          | 341     | 27       | 502  | 7    | 200       | 43  | 10         |
| H013_control | 1895     | 339          | 611     | 78       | 9    | 44   | 58        | 38  | 30         |

Abbreviations:

Pseudo: pseudotime classification, MK: megakaryocytes, PB: plasmablasts, DC: dendritic cells. Samples nomenclature based on patient ID (001-014) and time points of sample collection (TA first sample collection, TA2 three days after first sample collection, TB eight days after first sample collection, TC fourteen days after first sample collection, TE and rec for samples collected in recovery stage). Healthy controls as H002, H004, H006, H012 and H013.
